# Supplementary material
Source: publisher figshare collection journal article supplement (https://acs.figshare.com/ndownloader/files/5189176)
Supplement: Supplementary file 1 [file 5189176]

# 1. SUBMISSION DETAILS

data_global

_publ_contact_author_name        'Prof Hubert Schmidbaur'
_publ_contact_author_address     
;
 Anorganische und Analytische Chemie 
 Technische Universitaet Muenchen 
 Lichtenbergstr. 4 
 Garching 
 D-85747 
 GERMANY 
;


_publ_contact_author_phone   '++49 89 2891-3130'
_publ_contact_author_fax     '++49 89 2891-3125'
_publ_contact_author_email   'H.Schmidbaur@lrz.tu-muenchen.de'
_publ_requested_journal      'J. Am. Chem. Soc.'
_publ_requested_coeditor_name ?

_publ_contact_letter ?

#============================================================================

# 2. PROCESSING SUMMARY (IUCr Office Use Only)

_journal_date_recd_electronic     ?

_journal_date_to_coeditor         ?
_journal_date_from_coeditor       ?
_journal_date_accepted            ?

_journal_date_printers_first      ?
_journal_date_printers_final      ?
_journal_date_proofs_out          ?
_journal_date_proofs_in           ?

_journal_coeditor_name            ?
_journal_coeditor_code            ?
_journal_coeditor_notes
 ?

_journal_techeditor_code          ?
_journal_techeditor_notes
 ?

_journal_coden_ASTM               ?
_journal_name_full                ?
_journal_year                     ?
_journal_volume                   ?
_journal_issue                    ?
_journal_page_first               ?
_journal_page_last                ?

_journal_suppl_publ_number        ?
_journal_suppl_publ_pages         ?

#============================================================================

# 3. TITLE AND AUTHOR LIST

_publ_section_title
;
The Tetra(vinyl)phosphonium Cation [(CH2=CH2)4P]+
;
loop_
_publ_author_name
_publ_author_address
'H. Schmidbaur'
;   
 Anorganisch-chemisches Institut
 der Technischen Universit\"at M\"unchen
 Lichtenbergstra\"se 4
 D-85747 Garching
 Germany
;
'U. Monkowius'
;
 Anorganisch-chemisches Institut
 der Technischen Universit\"at M\"unchen
 Lichtenbergstra\"se 4
 D-85747 Garching
 Germany
;   
'S. Nogai'
;
 Anorganisch-chemisches Institut
 der Technischen Universit\"at M\"unchen
 Lichtenbergstra\"se 4
 D-85747 Garching
 Germany
;
#==============================================================================

data_uwe37 
 
_audit_creation_method            SHELXL-97 
_chemical_name_systematic 
; 
 ? 
; 
_chemical_name_common             '[PVi4]+[BPh4]-' 
_chemical_melting_point           ? 
_chemical_formula_moiety          ? 
_chemical_formula_sum 
 'C32 H32 B P' 
_chemical_formula_weight          458.36 
 
loop_ 
 _atom_type_symbol 
 _atom_type_description 
 _atom_type_scat_dispersion_real 
 _atom_type_scat_dispersion_imag 
 _atom_type_scat_source 
 'C'  'C'   0.0033   0.0016 
 'International Tables Vol C Tables 4.2.6.8 and 6.1.1.4' 
 'H'  'H'   0.0000   0.0000 
 'International Tables Vol C Tables 4.2.6.8 and 6.1.1.4' 
 'B'  'B'   0.0013   0.0007 
 'International Tables Vol C Tables 4.2.6.8 and 6.1.1.4' 
 'P'  'P'   0.1023   0.0942 
 'International Tables Vol C Tables 4.2.6.8 and 6.1.1.4' 
 
_symmetry_cell_setting            Orthorhombic 
_symmetry_space_group_name_H-M    Pnma 
 
loop_ 
 _symmetry_equiv_pos_as_xyz 
 'x, y, z' 
 '-x+1/2, -y, z+1/2' 
 '-x, y+1/2, -z' 
 'x+1/2, -y+1/2, -z+1/2' 
 '-x, -y, -z' 
 'x-1/2, y, -z-1/2' 
 'x, -y-1/2, z' 
 '-x-1/2, y-1/2, z-1/2' 
 
_cell_length_a                    19.3966(3) 
_cell_length_b                    13.7062(2) 
_cell_length_c                    9.91600(10) 
_cell_angle_alpha                 90.00 
_cell_angle_beta                  90.00 
_cell_angle_gamma                 90.00 
_cell_volume                      2636.20(6) 
_cell_formula_units_Z             4 
_cell_measurement_temperature     143(2) 
_cell_measurement_reflns_used     64920 
_cell_measurement_theta_min       ? 
_cell_measurement_theta_max       ? 
 
_exptl_crystal_description        plate 
_exptl_crystal_colour             colourless 
_exptl_crystal_size_max           0.30 
_exptl_crystal_size_mid           0.30 
_exptl_crystal_size_min           0.20 
_exptl_crystal_density_meas       ? 
_exptl_crystal_density_diffrn     1.155 
_exptl_crystal_density_method     'not measured' 
_exptl_crystal_F_000              976 
_exptl_absorpt_coefficient_mu     0.122 
_exptl_absorpt_correction_type    none 
_exptl_absorpt_correction_T_min   ? 
_exptl_absorpt_correction_T_max   ? 
_exptl_absorpt_process_details    ? 
 
_exptl_special_details 
; 
 ? 
; 
 
_diffrn_ambient_temperature       143(2) 
_diffrn_radiation_wavelength      0.71073 
_diffrn_radiation_type            MoK\a 
_diffrn_radiation_source          'fine-focus sealed tube' 
_diffrn_radiation_monochromator   graphite 
_diffrn_measurement_device_type   'NONIUS DIP 2020' 
_diffrn_measurement_method        phi-rotation 
_diffrn_detector_area_resol_mean  ? 
_diffrn_standards_number          ? 
_diffrn_standards_interval_count  ? 
_diffrn_standards_interval_time   ? 
_diffrn_standards_decay_%         ? 
_diffrn_reflns_number             64920 
_diffrn_reflns_av_R_equivalents   0.039 
_diffrn_reflns_av_sigmaI/netI     0.0211 
_diffrn_reflns_limit_h_min        0 
_diffrn_reflns_limit_h_max        23 
_diffrn_reflns_limit_k_min        -16 
_diffrn_reflns_limit_k_max        0 
_diffrn_reflns_limit_l_min        0 
_diffrn_reflns_limit_l_max        11 
_diffrn_reflns_theta_min          3.29 
_diffrn_reflns_theta_max          25.37 
_reflns_number_total              2513 
_reflns_number_gt                 2359 
_reflns_threshold_expression      >2sigma(I) 
 
_computing_data_collection        XPRESS 
_computing_cell_refinement        DENZO 
_computing_data_reduction         SCALEPACK 
_computing_structure_solution     'SHELXS-97 (Sheldrick, 1990)' 
_computing_structure_refinement   'SHELXL-97 (Sheldrick, 1997)' 
_computing_molecular_graphics     SHELXTL-PLUS 
_computing_publication_material   'SHELXL-97 (Sheldrick, 1997)' 
 
_refine_special_details 
; 
 Refinement of F^2^ against ALL reflections.  The weighted R-factor wR and 
 goodness of fit S are based on F^2^, conventional R-factors R are based 
 on F, with F set to zero for negative F^2^. The threshold expression of 
 F^2^ > 2sigma(F^2^) is used only for calculating R-factors(gt) etc. and is 
 not relevant to the choice of reflections for refinement.  R-factors based 
 on F^2^ are statistically about twice as large as those based on F, and R- 
 factors based on ALL data will be even larger. 
 The whole Vi4P-kation is disordered over two sites due to a mirror plane 
 trough C3, C4 and C6. All Hydrogen atoms of the Vi4P kation were
 calculated in ideal positions and refined after a riding model.
; 
 
_refine_ls_structure_factor_coef  Fsqd  
_refine_ls_matrix_type            full 
_refine_ls_weighting_scheme       calc  
_refine_ls_weighting_details 
 'calc w=1/[\s^2^(Fo^2^)+(0.0511P)^2^+1.3511P] where P=(Fo^2^+2Fc^2^)/3' 
_atom_sites_solution_primary      direct 
_atom_sites_solution_secondary    difmap 
_atom_sites_solution_hydrogens    mixed 
_refine_ls_hydrogen_treatment     mixed 
_refine_ls_extinction_method      none 
_refine_ls_extinction_coef        ? 
_refine_ls_number_reflns          2513 
_refine_ls_number_parameters      244 
_refine_ls_number_restraints      0 
_refine_ls_R_factor_all           0.0524 
_refine_ls_R_factor_gt            0.0496 
_refine_ls_wR_factor_ref          0.1250 
_refine_ls_wR_factor_gt           0.1229 
_refine_ls_goodness_of_fit_ref    1.071 
_refine_ls_restrained_S_all       1.071 
_refine_ls_shift/su_max           0.000 
_refine_ls_shift/su_mean          0.000 
 
loop_ 
 _atom_site_label 
 _atom_site_type_symbol 
 _atom_site_fract_x 
 _atom_site_fract_y 
 _atom_site_fract_z 
 _atom_site_U_iso_or_equiv 
 _atom_site_adp_type 
 _atom_site_occupancy 
 _atom_site_symmetry_multiplicity 
 _atom_site_calc_flag 
 _atom_site_refinement_flags 
 _atom_site_disorder_assembly 
 _atom_site_disorder_group 
P1 P 0.12324(4) 0.21371(6) 0.76351(9) 0.0384(2) Uani 0.50 1 d P . . 
B1 B 0.40866(12) 0.2500 0.2499(2) 0.0283(5) Uani 1 2 d S . . 
C2 C 0.0254(3) 0.0945(4) 0.8669(5) 0.0722(13) Uani 0.50 1 d P . . 
H2A H 0.0125 0.1465 0.9250 0.087 Uiso 0.50 1 calc PR A 2 
H2B H 0.0017 0.0340 0.8713 0.087 Uiso 0.50 1 calc PR A 2 
C3 C 0.13612(15) 0.2500 0.5879(3) 0.0541(7) Uani 1 2 d S D . 
H3 H 0.0959(18) 0.2500 0.535(3) 0.074(10) Uiso 1 2 d S . . 
C4 C 0.19716(15) 0.2500 0.5380(3) 0.0478(6) Uani 1 2 d S . . 
H4A H 0.2028(16) 0.2500 0.438(3) 0.068(9) Uiso 1 2 d S . . 
H4B H 0.2404(18) 0.2500 0.595(4) 0.076(10) Uiso 1 2 d S . . 
C5 C 0.20422(18) 0.1952(3) 0.8426(3) 0.0506(9) Uani 0.50 1 d P D . 
H5A H 0.2258 0.1342 0.8256 0.061 Uiso 0.50 1 calc PR . . 
C6 C 0.23500(16) 0.2500 0.9145(3) 0.0736(10) Uani 1 2 d S . . 
H6A H 0.2161 0.3122 0.9353 0.088 Uiso 0.50 1 calc PR D . 
H6B H 0.2784 0.2314 0.9509 0.088 Uiso 0.50 1 calc PR . . 
C7 C 0.0786(2) 0.3103(3) 0.8435(4) 0.0559(10) Uani 0.50 1 d P C . 
H7A H 0.0565 0.3005 0.9280 0.067 Uiso 0.50 1 calc PR B 1 
C8 C 0.0765(4) 0.3952(4) 0.7843(5) 0.0429(19) Uani 0.50 1 d P C 1 
H8A H 0.0987 0.4043 0.6999 0.051 Uiso 0.50 1 calc PR C 1 
H8B H 0.0528 0.4480 0.8256 0.051 Uiso 0.50 1 calc PR C 1 
C1 C 0.0709(5) 0.1051(7) 0.7894(12) 0.102(4) Uani 0.50 1 d P D 2 
H1A H 0.0815 0.0505 0.7340 0.122 Uiso 0.50 1 calc PR D 2 
C11 C 0.37802(7) 0.15585(10) 0.16710(14) 0.0311(3) Uani 1 1 d . . . 
C12 C 0.41074(11) 0.11910(13) 0.05199(16) 0.0442(4) Uani 1 1 d . . . 
H12 H 0.4546(11) 0.1449(15) 0.028(2) 0.055(6) Uiso 1 1 d . . . 
C13 C 0.38207(12) 0.04565(14) -0.02756(18) 0.0547(5) Uani 1 1 d . . . 
H13 H 0.4085(12) 0.0244(17) -0.103(2) 0.073(7) Uiso 1 1 d . . . 
C14 C 0.31892(12) 0.00689(13) 0.0046(2) 0.0580(6) Uani 1 1 d . . . 
H14 H 0.2986(12) -0.0466(18) -0.048(2) 0.079(7) Uiso 1 1 d . . . 
C15 C 0.28482(10) 0.04065(13) 0.1175(2) 0.0569(6) Uani 1 1 d . . . 
H15 H 0.2408(12) 0.0121(17) 0.145(2) 0.074(7) Uiso 1 1 d . . . 
C16 C 0.31391(9) 0.11369(12) 0.1970(2) 0.0430(4) Uani 1 1 d . . . 
H16 H 0.2871(11) 0.1373(15) 0.279(2) 0.060(6) Uiso 1 1 d . . . 
C21 C 0.49349(10) 0.2500 0.25597(19) 0.0273(4) Uani 1 2 d S . . 
C22 C 0.53169(9) 0.16476(12) 0.2671(2) 0.0451(4) Uani 1 1 d . . . 
H22 H 0.5073(12) 0.1023(17) 0.263(2) 0.069(6) Uiso 1 1 d . . . 
C23 C 0.60268(9) 0.16426(14) 0.2895(2) 0.0508(5) Uani 1 1 d . . . 
H23 H 0.6267(13) 0.104(2) 0.300(3) 0.080(7) Uiso 1 1 d . . . 
C24 C 0.63840(12) 0.2500 0.3013(2) 0.0400(5) Uani 1 2 d S . . 
H24 H 0.6887(15) 0.2500 0.318(3) 0.052(8) Uiso 1 2 d S . . 
C31 C 0.38714(10) 0.2500 0.4103(2) 0.0323(5) Uani 1 2 d S . . 
C32 C 0.38252(12) 0.16491(17) 0.48507(19) 0.0570(5) Uani 1 1 d . . . 
H32 H 0.3842(12) 0.1029(19) 0.440(2) 0.076(7) Uiso 1 1 d . . . 
C33 C 0.37635(13) 0.1647(2) 0.6256(2) 0.0706(7) Uani 1 1 d . . . 
H33 H 0.3764(15) 0.105(2) 0.673(3) 0.112(10) Uiso 1 1 d . . . 
C34 C 0.37337(13) 0.2500 0.6959(3) 0.0589(8) Uani 1 2 d S . . 
H34 H 0.3696(16) 0.2500 0.796(4) 0.070(9) Uiso 1 2 d S . . 
 
loop_ 
 _atom_site_aniso_label 
 _atom_site_aniso_U_11 
 _atom_site_aniso_U_22 
 _atom_site_aniso_U_33 
 _atom_site_aniso_U_23 
 _atom_site_aniso_U_13 
 _atom_site_aniso_U_12 
P1 0.0341(4) 0.0428(4) 0.0382(4) -0.0085(3) -0.0023(3) 0.0033(3) 
B1 0.0294(11) 0.0307(11) 0.0248(11) 0.000 0.0004(9) 0.000 
C2 0.082(3) 0.060(3) 0.075(3) -0.018(2) 0.035(3) -0.012(2) 
C3 0.0468(15) 0.078(2) 0.0378(13) 0.000 -0.0105(12) 0.000 
C4 0.0564(16) 0.0503(15) 0.0367(13) 0.000 -0.0012(12) 0.000 
C5 0.0392(18) 0.080(3) 0.0323(17) -0.0086(17) 0.0017(14) 0.0024(18) 
C6 0.0476(15) 0.140(3) 0.0332(14) 0.000 -0.0002(13) 0.000 
C7 0.058(2) 0.049(2) 0.061(2) -0.0089(19) 0.0144(19) 0.0050(18) 
C8 0.071(4) 0.028(3) 0.030(2) -0.0004(19) 0.018(2) -0.022(3) 
C1 0.070(5) 0.080(7) 0.156(9) -0.016(6) 0.022(5) -0.050(4) 
C11 0.0355(8) 0.0291(7) 0.0288(7) 0.0048(6) -0.0074(6) -0.0004(6) 
C12 0.0624(11) 0.0407(9) 0.0296(8) -0.0028(7) -0.0002(7) -0.0119(8) 
C13 0.0919(16) 0.0404(10) 0.0318(9) -0.0035(8) -0.0121(9) -0.0065(10) 
C14 0.0813(14) 0.0307(9) 0.0620(12) 0.0002(8) -0.0400(11) -0.0062(9) 
C15 0.0467(10) 0.0346(9) 0.0893(16) 0.0036(10) -0.0236(10) -0.0071(8) 
C16 0.0368(8) 0.0334(8) 0.0589(10) 0.0030(8) -0.0082(8) -0.0013(7) 
C21 0.0315(10) 0.0314(10) 0.0191(9) 0.000 0.0025(8) 0.000 
C22 0.0350(8) 0.0337(9) 0.0667(12) -0.0043(8) -0.0032(8) 0.0017(7) 
C23 0.0364(9) 0.0471(10) 0.0688(12) -0.0059(9) -0.0049(9) 0.0113(8) 
C24 0.0296(11) 0.0609(15) 0.0294(11) 0.000 0.0023(9) 0.000 
C31 0.0228(9) 0.0451(12) 0.0291(10) 0.000 -0.0002(8) 0.000 
C32 0.0827(14) 0.0557(12) 0.0325(9) 0.0087(9) 0.0025(9) 0.0097(10) 
C33 0.0876(17) 0.0895(18) 0.0346(10) 0.0217(11) 0.0019(10) 0.0013(13) 
C34 0.0372(13) 0.115(3) 0.0240(12) 0.000 0.0019(10) 0.000 
 
_geom_special_details 
; 
 All esds (except the esd in the dihedral angle between two l.s. planes) 
 are estimated using the full covariance matrix.  The cell esds are taken 
 into account individually in the estimation of esds in distances, angles 
 and torsion angles; correlations between esds in cell parameters are only 
 used when they are defined by crystal symmetry.  An approximate (isotropic) 
 treatment of cell esds is used for estimating esds involving l.s. planes. 
; 
 
loop_ 
 _geom_bond_atom_site_label_1 
 _geom_bond_atom_site_label_2 
 _geom_bond_distance 
 _geom_bond_site_symmetry_2 
 _geom_bond_publ_flag 
P1 C7 1.770(4) . ? 
P1 C5 1.774(4) . ? 
P1 C1 1.820(8) . ? 
P1 C3 1.828(3) . ? 
B1 C11 1.641(2) . ? 
B1 C11 1.641(2) 7_565 ? 
B1 C31 1.645(3) . ? 
B1 C21 1.646(3) . ? 
C2 C1 1.179(10) . ? 
C2 H2A 0.9500 . ? 
C2 H2B 0.9500 . ? 
C3 C4 1.283(4) . ? 
C3 H3 0.94(4) . ? 
C4 H4A 1.00(3) . ? 
C4 H4B 1.01(4) . ? 
C5 C6 1.196(4) . ? 
C5 H5A 0.9500 . ? 
C6 H6A 0.9500 . ? 
C6 H6B 0.9500 . ? 
C7 C8 1.304(7) . ? 
C7 H7A 0.9500 . ? 
C8 H8A 0.9500 . ? 
C8 H8B 0.9500 . ? 
C1 H1A 0.9500 . ? 
C11 C12 1.400(2) . ? 
C11 C16 1.403(2) . ? 
C12 C13 1.395(2) . ? 
C12 H12 0.95(2) . ? 
C13 C14 1.373(3) . ? 
C13 H13 0.95(2) . ? 
C14 C15 1.380(3) . ? 
C14 H14 0.98(2) . ? 
C15 C16 1.393(3) . ? 
C15 H15 0.98(2) . ? 
C16 H16 1.02(2) . ? 
C21 C22 1.3879(19) 7_565 ? 
C21 C22 1.3879(19) . ? 
C22 C23 1.395(2) . ? 
C22 H22 0.98(2) . ? 
C23 C24 1.369(2) . ? 
C23 H23 0.95(3) . ? 
C24 C23 1.369(2) 7_565 ? 
C24 H24 0.99(3) . ? 
C31 C32 1.385(2) 7_565 ? 
C31 C32 1.385(2) . ? 
C32 C33 1.399(3) . ? 
C32 H32 0.96(3) . ? 
C33 C34 1.362(3) . ? 
C33 H33 0.94(3) . ? 
C34 C33 1.362(3) 7_565 ? 
C34 H34 1.00(3) . ? 
 
loop_ 
 _geom_angle_atom_site_label_1 
 _geom_angle_atom_site_label_2 
 _geom_angle_atom_site_label_3 
 _geom_angle 
 _geom_angle_site_symmetry_1 
 _geom_angle_site_symmetry_3 
 _geom_angle_publ_flag 
C7 P1 C5 110.03(19) . . ? 
C7 P1 C1 106.0(4) . . ? 
C5 P1 C1 108.3(4) . . ? 
C7 P1 C3 106.88(16) . . ? 
C5 P1 C3 109.81(15) . . ? 
C1 P1 C3 115.7(4) . . ? 
C11 B1 C11 103.71(16) . 7_565 ? 
C11 B1 C31 113.08(11) . . ? 
C11 B1 C31 113.08(11) 7_565 . ? 
C11 B1 C21 112.35(11) . . ? 
C11 B1 C21 112.35(11) 7_565 . ? 
C31 B1 C21 102.60(15) . . ? 
C1 C2 H2A 120.0 . . ? 
C1 C2 H2B 120.0 . . ? 
H2A C2 H2B 120.0 . . ? 
C4 C3 P1 119.6(2) . . ? 
C4 C3 H3 124(2) . . ? 
P1 C3 H3 115(2) . . ? 
C3 C4 H4A 119.0(18) . . ? 
C3 C4 H4B 123.3(19) . . ? 
H4A C4 H4B 118(3) . . ? 
C6 C5 P1 128.0(3) . . ? 
C6 C5 H5A 116.0 . . ? 
P1 C5 H5A 116.0 . . ? 
C5 C6 H6A 120.0 . . ? 
C5 C6 H6B 120.0 . . ? 
H6A C6 H6B 120.0 . . ? 
C8 C7 P1 118.7(4) . . ? 
C8 C7 H7A 120.6 . . ? 
P1 C7 H7A 120.6 . . ? 
C7 C8 H8A 120.0 . . ? 
C7 C8 H8B 120.0 . . ? 
H8A C8 H8B 120.0 . . ? 
C2 C1 P1 127.6(8) . . ? 
C2 C1 H1A 116.2 . . ? 
P1 C1 H1A 116.2 . . ? 
C12 C11 C16 115.20(15) . . ? 
C12 C11 B1 121.79(15) . . ? 
C16 C11 B1 122.64(15) . . ? 
C13 C12 C11 122.70(18) . . ? 
C13 C12 H12 118.8(12) . . ? 
C11 C12 H12 118.5(12) . . ? 
C14 C13 C12 120.3(2) . . ? 
C14 C13 H13 123.0(14) . . ? 
C12 C13 H13 116.8(15) . . ? 
C13 C14 C15 119.09(17) . . ? 
C13 C14 H14 121.4(14) . . ? 
C15 C14 H14 119.4(14) . . ? 
C14 C15 C16 120.36(19) . . ? 
C14 C15 H15 120.8(14) . . ? 
C16 C15 H15 118.7(14) . . ? 
C15 C16 C11 122.39(19) . . ? 
C15 C16 H16 118.3(12) . . ? 
C11 C16 H16 119.3(12) . . ? 
C22 C21 C22 114.7(2) 7_565 . ? 
C22 C21 B1 122.44(10) 7_565 . ? 
C22 C21 B1 122.44(10) . . ? 
C21 C22 C23 122.95(17) . . ? 
C21 C22 H22 118.3(13) . . ? 
C23 C22 H22 118.7(13) . . ? 
C24 C23 C22 120.59(18) . . ? 
C24 C23 H23 119.2(15) . . ? 
C22 C23 H23 120.2(15) . . ? 
C23 C24 C23 118.3(2) . 7_565 ? 
C23 C24 H24 120.87(11) . . ? 
C23 C24 H24 120.87(11) 7_565 . ? 
C32 C31 C32 114.7(2) 7_565 . ? 
C32 C31 B1 122.29(11) 7_565 . ? 
C32 C31 B1 122.29(11) . . ? 
C31 C32 C33 122.7(2) . . ? 
C31 C32 H32 119.6(15) . . ? 
C33 C32 H32 117.7(15) . . ? 
C34 C33 C32 120.8(2) . . ? 
C34 C33 H33 120(2) . . ? 
C32 C33 H33 120(2) . . ? 
C33 C34 C33 118.2(3) . 7_565 ? 
C33 C34 H34 120.90(13) . . ? 
C33 C34 H34 120.90(13) 7_565 . ? 
 
loop_ 
 _geom_torsion_atom_site_label_1 
 _geom_torsion_atom_site_label_2 
 _geom_torsion_atom_site_label_3 
 _geom_torsion_atom_site_label_4 
 _geom_torsion 
 _geom_torsion_site_symmetry_1 
 _geom_torsion_site_symmetry_2 
 _geom_torsion_site_symmetry_3 
 _geom_torsion_site_symmetry_4 
 _geom_torsion_publ_flag 
C7 P1 C3 C4 125.34(16) . . . . ? 
C5 P1 C3 C4 6.01(18) . . . . ? 
C1 P1 C3 C4 -116.9(4) . . . . ? 
C7 P1 C5 C6 -18.0(4) . . . . ? 
C1 P1 C5 C6 -133.5(5) . . . . ? 
C3 P1 C5 C6 99.4(3) . . . . ? 
C5 P1 C7 C8 103.3(4) . . . . ? 
C1 P1 C7 C8 -139.8(4) . . . . ? 
C3 P1 C7 C8 -15.9(5) . . . . ? 
C7 P1 C1 C2 -15.3(12) . . . . ? 
C5 P1 C1 C2 102.7(11) . . . . ? 
C3 P1 C1 C2 -133.6(10) . . . . ? 
C11 B1 C11 C12 84.05(19) 7_565 . . . ? 
C31 B1 C11 C12 -153.09(15) . . . . ? 
C21 B1 C11 C12 -37.5(2) . . . . ? 
C11 B1 C11 C16 -88.65(18) 7_565 . . . ? 
C31 B1 C11 C16 34.2(2) . . . . ? 
C21 B1 C11 C16 149.79(15) . . . . ? 
C16 C11 C12 C13 -0.2(2) . . . . ? 
B1 C11 C12 C13 -173.39(16) . . . . ? 
C11 C12 C13 C14 0.7(3) . . . . ? 
C12 C13 C14 C15 -0.9(3) . . . . ? 
C13 C14 C15 C16 0.6(3) . . . . ? 
C14 C15 C16 C11 0.0(3) . . . . ? 
C12 C11 C16 C15 -0.2(2) . . . . ? 
B1 C11 C16 C15 172.98(15) . . . . ? 
C11 B1 C21 C22 152.33(16) . . . 7_565 ? 
C11 B1 C21 C22 35.8(2) 7_565 . . 7_565 ? 
C31 B1 C21 C22 -85.92(17) . . . 7_565 ? 
C11 B1 C21 C22 -35.8(2) . . . . ? 
C11 B1 C21 C22 -152.33(16) 7_565 . . . ? 
C31 B1 C21 C22 85.92(17) . . . . ? 
C22 C21 C22 C23 0.8(4) 7_565 . . . ? 
B1 C21 C22 C23 -171.60(19) . . . . ? 
C21 C22 C23 C24 -0.2(3) . . . . ? 
C22 C23 C24 C23 -0.5(4) . . . 7_565 ? 
C11 B1 C31 C32 -153.72(17) . . . 7_565 ? 
C11 B1 C31 C32 -36.2(3) 7_565 . . 7_565 ? 
C21 B1 C31 C32 85.03(18) . . . 7_565 ? 
C11 B1 C31 C32 36.2(3) . . . . ? 
C11 B1 C31 C32 153.72(17) 7_565 . . . ? 
C21 B1 C31 C32 -85.03(18) . . . . ? 
C32 C31 C32 C33 -2.4(4) 7_565 . . . ? 
B1 C31 C32 C33 168.4(2) . . . . ? 
C31 C32 C33 C34 1.2(4) . . . . ? 
C32 C33 C34 C33 0.2(5) . . . 7_565 ? 
 
_diffrn_measured_fraction_theta_max    0.996 
_diffrn_reflns_theta_full              25.37 
_diffrn_measured_fraction_theta_full   0.996 
_refine_diff_density_max    0.529 
_refine_diff_density_min   -0.342 
_refine_diff_density_rms    0.036 
